# Supplementary material for: New insights into the comorbid conditions of Turner syndrome: results from a long-term monocentric cohort study
Source: J Endocrinol Invest. 2022 Jul 30;45(12):2247–56. doi: 10.1007/s40618-022-01853-z (PMC9646560; doi:10.1007/s40618-022-01853-z)
Supplement: Supplementary file 1 — Supplementary file1 (PDF 48 kb) [file 40618_2022_1853_MOESM1_ESM.pdf]

**Supplemental Table 1.** Prevalence of comorbid conditions by age group. National data are provided for comparison.

|                 | Study cohort Age group (at follow-up) |       |       |       | National data Age group (Istat 2019) |       |       |       |       |       |       |
|-----------------|---------------------------------------|-------|-------|-------|--------------------------------------|-------|-------|-------|-------|-------|-------|
|                 | 21-34                                 | 35-44 | 45-66 | P     | 20-24                                | 25-34 | 35-44 | 45-54 | 55-59 | 60-64 | 65-74 |
| Hypertension    | 10.6                                  | 28.2  | 41.3  | <.001 | 1.1                                  | 1.5   | 3.6   | 12    | 21.4  | 30    | 43.3  |
| Type 2 diabetes | 6.1                                   | 15    | 41.2  | <.001 | 0.6                                  | 0.8   | 1.4   | 2.2   | 5.2   | 7.1   | 12.6  |
| Osteoporosis    | 37.9                                  | 20    | 2.9   | <.001 | 0.6                                  | 0.6   | 1.5   | 5.5   | 15.2  | 21    | 32.2  |
| N               | 66                                    | 60    | 34    |       |                                      |       |       |       |       |       |       |
